# Supplementary material for: RNA-seq analysis and in vivo experiments identified the protective effect of kaempferol on idiopathic pulmonary fibrosis by regulating the PPARG/TNC signaling pathway to reduce ECM deposition
Source: Royal Society of Chemistry journal article supplement (doi:10.1039/d4fo01474j), 2024-01-01
Supplement: d4fo01474j1.pdf [file d4fo01474j1.pdf]

**Supplementary table 1. The RNA-Seq clean data**

| <b>Sample</b> | <b>RawRea<br/>ds(M)</b> | <b>RawBase<br/>s(G)</b> | <b>CleanRea<br/>ds(M)</b> | <b>CleanBase<br/>s(G)</b> | <b>ValidBase<br/>s(%)</b> | <b>Q30<br/>(%)</b> | <b>GC<br/>(%)</b> |
|---------------|-------------------------|-------------------------|---------------------------|---------------------------|---------------------------|--------------------|-------------------|
| Control 1     | 50.12                   | 7.3                     | 48.21                     | 7.02                      | 96.2                      | 95.25              | 49.15             |
| Control 2     | 49.94                   | 7.24                    | 47.86                     | 6.94                      | 95.82                     | 95.34              | 48.99             |
| Control 3     | 50.35                   | 7.28                    | 48.1                      | 6.95                      | 95.52                     | 94.88              | 49.42             |
| Control 4     | 52.91                   | 7.48                    | 49.36                     | 6.98                      | 93.3                      | 94.92              | 49.51             |
| Model 1       | 49.73                   | 7.22                    | 47.64                     | 6.91                      | 95.81                     | 94.79              | 49.68             |
| Model 2       | 49.39                   | 7.18                    | 47.43                     | 6.89                      | 96.02                     | 94.95              | 49.84             |
| Model 3       | 49.74                   | 7.22                    | 47.57                     | 6.9                       | 95.64                     | 94.79              | 49.88             |
| Model 4       | 50.1                    | 7.29                    | 48.11                     | 7                         | 96.04                     | 94.82              | 49.23             |
| KMP-L 1       | 50.25                   | 7.26                    | 47.69                     | 6.89                      | 94.91                     | 92.53              | 49.4              |
| KMP-L 2       | 51.01                   | 7.35                    | 48.23                     | 6.95                      | 94.55                     | 92.22              | 49.39             |
| KMP-L 3       | 51.45                   | 7.39                    | 48.31                     | 6.94                      | 93.91                     | 93.35              | 49.3              |
| KMP-L4        | 50.61                   | 7.27                    | 48.05                     | 6.91                      | 94.95                     | 94.88              | 49.14             |
