# Supplementary material for: RNA-seq analysis and in vivo experiments identified the protective effect of kaempferol on idiopathic pulmonary fibrosis by regulating the PPARG/TNC signaling pathway to reduce ECM deposition
Source: Royal Society of Chemistry journal article supplement (doi:10.1039/d4fo01474j), 2024-01-01
Supplement: d4fo01474j2.pdf [file d4fo01474j2.pdf]

**Supplementary table 2. Topological analysis of the PPI network of the DEGs**

| NO. | gene   | Degree | Betweenness | Closeness   |
|-----|--------|--------|-------------|-------------|
| 1   | Mki67  | 161    | 101667.28   | 0.0516983   |
| 2   | Il6    | 157    | 144074.5    | 0.0518667   |
| 3   | Cdk1   | 144    | 19579.043   | 0.05114142  |
| 4   | Ccna2  | 143    | 11416.391   | 0.050972667 |
| 5   | Aurka  | 143    | 14987.752   | 0.05080752  |
| 6   | Bub1   | 142    | 5027.2803   | 0.05032578  |
| 7   | Kif11  | 141    | 9355.763    | 0.05058651  |
| 8   | Ccnb1  | 140    | 12291.514   | 0.05098271  |
| 9   | Plk1   | 140    | 6860.3945   | 0.050603822 |
| 10  | Cdc20  | 138    | 2165.8574   | 0.050330676 |
| 11  | Bub1b  | 137    | 894.3649    | 0.050274447 |
| 12  | Exo1   | 136    | 6399.682    | 0.050347812 |
| 13  | Kif20a | 136    | 2440.4917   | 0.050333124 |
| 14  | Cdca8  | 136    | 3740.5037   | 0.050330676 |
| 15  | Aurkb  | 135    | 3618.3076   | 0.05063601  |
| 16  | Kif4   | 135    | 2745.62     | 0.050364964 |
| 17  | Kif2c  | 135    | 1525.0878   | 0.050306212 |
| 18  | Top2a  | 134    | 5215.5356   | 0.050480418 |
| 19  | Nuf2   | 133    | 1087.9779   | 0.050296433 |
| 20  | Ttk    | 133    | 601.5841    | 0.05028177  |
| 21  | Kif23  | 131    | 2204.01     | 0.050291546 |
| 22  | Ccnb2  | 130    | 3166.4773   | 0.05036006  |
| 23  | Birc5  | 130    | 3531.607    | 0.05032823  |
| 24  | Cdca5  | 130    | 954.05707   | 0.050276887 |
| 25  | Ndc80  | 130    | 1485.4036   | 0.050272003 |
| 26  | Cenpe  | 129    | 696.68756   | 0.0502476   |
| 27  | Pbk    | 128    | 405.0537    | 0.050274447 |
| 28  | Mad211 | 127    | 14102.92    | 0.05050505  |
| 29  | Cdc45  | 127    | 4647.6494   | 0.05044843  |
| 30  | Ska1   | 127    | 2183.2766   | 0.050298877 |
| 31  | Sgo1   | 127    | 652.27344   | 0.050257355 |
| 32  | Nusap1 | 126    | 708.5632    | 0.050320886 |
| 33  | Aspm   | 126    | 3502.5234   | 0.050308656 |
| 34  | Melk   | 126    | 366.96588   | 0.0502598   |
| 35  | Dlgap5 | 126    | 359.26324   | 0.050220776 |
| 36  | Ncapg  | 125    | 1170.166    | 0.05020129  |
| 37  | Cenpf  | 123    | 8678.793    | 0.05039439  |
| 38  | Esp11  | 123    | 2277.5474   | 0.050276887 |
| 39  | Cep55  | 123    | 225.52469   | 0.050208595 |
| 40  | Pre1   | 121    | 2629.9512   | 0.050347812 |
| 41  | Ube2c  | 121    | 1080.3743   | 0.05026468  |
| 42  | Spag5  | 121    | 269.88275   | 0.05020129  |

---

|    |          |     |           |             |
|----|----------|-----|-----------|-------------|
| 43 | Fnl      | 120 | 85160.05  | 0.051644128 |
| 44 | Kntc1    | 120 | 420.14447 | 0.050198857 |
| 45 | Shcbp1   | 118 | 386.5414  | 0.05020129  |
| 46 | Racgap1  | 118 | 1543.65   | 0.05019642  |
| 47 | Cdca2    | 118 | 363.38596 | 0.0501575   |
| 48 | Rrm2     | 117 | 7696.568  | 0.050355162 |
| 49 | Trip13   | 117 | 305.58566 | 0.05022809  |
| 50 | Cenpa    | 116 | 4730.28   | 0.050566737 |
| 51 | Kif20b   | 116 | 1516.7771 | 0.050213467 |
| 52 | Kif15    | 116 | 421.1829  | 0.050169654 |
| 53 | Cdc6     | 115 | 934.23956 | 0.050320886 |
| 54 | Kif18b   | 115 | 1092.8243 | 0.05018912  |
| 55 | Cenpi    | 114 | 9162.007  | 0.05039194  |
| 56 | Cdca3    | 114 | 264.95776 | 0.050130777 |
| 57 | Rad51ap1 | 113 | 4392.184  | 0.050347812 |
| 58 | Foxm1    | 113 | 1301.2462 | 0.05032823  |
| 59 | Ect2     | 113 | 1848.6475 | 0.050186686 |
| 60 | Rad51    | 112 | 618.5184  | 0.050198857 |
| 61 | Ckap2    | 112 | 2507.7986 | 0.05013806  |
| 62 | Cenpn    | 112 | 235.51968 | 0.049862698 |
| 63 | Kif22    | 110 | 455.47247 | 0.05012592  |
| 64 | Tacc3    | 108 | 1670.4862 | 0.05018912  |
| 65 | Cdc25c   | 108 | 214.19241 | 0.05014535  |
| 66 | Hmmr     | 107 | 3203.4448 | 0.05035271  |
| 67 | Mcm10    | 106 | 1321.2487 | 0.050289102 |
| 68 | Ncapg2   | 106 | 334.3133  | 0.050169654 |
| 69 | Cenph    | 106 | 360.09094 | 0.05015993  |
| 70 | Zwilch   | 106 | 146.40514 | 0.05011621  |
| 71 | Brcal    | 105 | 21754.24  | 0.051035505 |
| 72 | Ska3     | 105 | 264.45865 | 0.05008226  |
| 73 | Cenpk    | 104 | 2214.3945 | 0.050133206 |
| 74 | Ckap2l   | 104 | 2240.1143 | 0.050121065 |
| 75 | Spc25    | 104 | 524.9196  | 0.050101656 |
| 76 | Hells    | 102 | 257.64166 | 0.050172087 |
| 77 | Clspn    | 102 | 464.93414 | 0.05014778  |
| 78 | Uhrf1    | 102 | 2822.5454 | 0.050142918 |
| 79 | Mcm5     | 101 | 659.1922  | 0.05026468  |
| 80 | Asf1b    | 101 | 669.80133 | 0.050133206 |
| 81 | Ncapd2   | 101 | 136.98865 | 0.05009438  |
| 82 | Parpbp   | 101 | 355.13766 | 0.04977158  |
| 83 | Anln     | 98  | 3552.84   | 0.050350264 |
| 84 | Incenp   | 97  | 198.99156 | 0.05006046  |
| 85 | Rad54l   | 97  | 408.59317 | 0.04984829  |
| 86 | Esco2    | 96  | 138.38159 | 0.050084684 |

---

---

|     |           |    |            |             |
|-----|-----------|----|------------|-------------|
| 87  | Dtl       | 95 | 225.97897  | 0.05014049  |
| 88  | Arhgap11a | 95 | 200.83276  | 0.0500653   |
| 89  | Depdc1a   | 94 | 145.9116   | 0.05008226  |
| 90  | Knstrn    | 94 | 102.21179  | 0.050029002 |
| 91  | Ercc6l    | 94 | 6835.7495  | 0.050004832 |
| 92  | Gins2     | 94 | 195.72632  | 0.04975244  |
| 93  | Neil3     | 92 | 403.40414  | 0.05011621  |
| 94  | Cdkn3     | 92 | 480.18652  | 0.049997583 |
| 95  | Cenpm     | 90 | 58.98413   | 0.050029002 |
| 96  | Kifc1     | 87 | 253.03004  | 0.050026584 |
| 97  | Tpx2      | 87 | 91.2262    | 0.049997583 |
| 98  | Oip5      | 87 | 34.64555   | 0.049668875 |
| 99  | Pclaf     | 86 | 1010.34485 | 0.050067723 |
| 100 | Kif14     | 86 | 300.8536   | 0.050058037 |
| 101 | Fanci     | 85 | 719.8767   | 0.050038677 |
| 102 | Ccl2      | 84 | 11545.74   | 0.050965138 |
| 103 | Troap     | 84 | 5286.422   | 0.050333124 |
| 104 | E2f8      | 84 | 3266.004   | 0.050286658 |
| 105 | Tyms      | 84 | 4345.9116  | 0.050130777 |
| 106 | Colla1    | 83 | 26581.945  | 0.051113635 |
| 107 | Tk1       | 83 | 2387.5315  | 0.050091956 |
| 108 | Cks2      | 83 | 70.24937   | 0.05001208  |
| 109 | Orc1      | 83 | 735.4644   | 0.049730923 |
| 110 | Cenpw     | 83 | 232.42152  | 0.04964743  |
| 111 | Pimreg    | 81 | 1432.9388  | 0.049966205 |
| 112 | Spc24     | 79 | 70.751175  | 0.049652196 |
| 113 | Figl1     | 78 | 60.816776  | 0.04969272  |
| 114 | Mis18bp1  | 77 | 33.3436    | 0.049738094 |
| 115 | Mastl     | 75 | 33.432587  | 0.049573716 |
| 116 | Depdc1b   | 74 | 2542.151   | 0.050152637 |
| 117 | Igfl      | 73 | 26599.025  | 0.05130366  |
| 118 | Gtse1     | 73 | 3728.5225  | 0.0501575   |
| 119 | Pole      | 73 | 850.08014  | 0.05007499  |
| 120 | Timp1     | 72 | 15699.181  | 0.050884955 |
| 121 | Cxcl10    | 71 | 5536.476   | 0.050705466 |
| 122 | Ccnf      | 71 | 46.801556  | 0.04996138  |
| 123 | Stil      | 71 | 3123.9685  | 0.049932458 |
| 124 | Cd68      | 70 | 13388.088  | 0.050962627 |
| 125 | Kn11      | 68 | 54.871914  | 0.04950732  |
| 126 | Apoe      | 67 | 24132.705  | 0.05085995  |
| 127 | Adgre1    | 67 | 9675.152   | 0.050852455 |
| 128 | Spdl1     | 67 | 3961.711   | 0.049877115 |
| 129 | Sgo2a     | 67 | 12.886142  | 0.04958084  |
| 130 | Cenpp     | 67 | 9.220649   | 0.049552355 |

---

---

|     |        |    |           |             |
|-----|--------|----|-----------|-------------|
| 131 | Col3a1 | 65 | 13449.681 | 0.05090748  |
| 132 | Tlr2   | 65 | 9897.331  | 0.0507801   |
| 133 | Ticrr  | 65 | 1423.1348 | 0.04996138  |
| 134 | Lep    | 64 | 20301.654 | 0.050678156 |
| 135 | Prr11  | 64 | 147.3876  | 0.04987231  |
| 136 | Ube2t  | 63 | 241.54318 | 0.049695108 |
| 137 | Bora   | 63 | 11.099143 | 0.04943638  |
| 138 | Colla2 | 62 | 8721.311  | 0.050797544 |
| 139 | Cxcl1  | 62 | 7327.662  | 0.050688084 |
| 140 | Fcgr3  | 61 | 8576.968  | 0.050608773 |
| 141 | Ttn    | 61 | 15785.718 | 0.050470572 |
| 142 | Brip1  | 60 | 1548.5693 | 0.049549982 |
| 143 | Mb     | 56 | 20512.098 | 0.05047303  |
| 144 | Lrr1   | 56 | 8428.398  | 0.049817096 |
| 145 | Fam83d | 56 | 10.352852 | 0.049391553 |
| 146 | Ccne1  | 55 | 8297.528  | 0.05064344  |
| 147 | Actc1  | 54 | 16262.577 | 0.050561797 |
| 148 | Tcap   | 54 | 7459.928  | 0.05006046  |
| 149 | Actn2  | 54 | 5089.9185 | 0.04979313  |
| 150 | Myh6   | 53 | 10056.701 | 0.05024272  |
| 151 | Myl3   | 53 | 2615.8506 | 0.049728535 |
| 152 | Ckmt2  | 52 | 5754.781  | 0.049795527 |
| 153 | Csrp3  | 51 | 4576.255  | 0.04996862  |
| 154 | Myoz2  | 51 | 2193.743  | 0.049745265 |
| 155 | Adipoq | 50 | 19450.56  | 0.050613724 |
| 156 | Iqgap3 | 50 | 1344.8472 | 0.05007499  |
| 157 | Chtf18 | 50 | 38.370087 | 0.049514424 |
| 158 | Cks1b  | 50 | 11.524426 | 0.049462367 |
| 159 | Aif1   | 49 | 14669.088 | 0.05072535  |
| 160 | Eln    | 49 | 8721.889  | 0.050705466 |
| 161 | Mmp13  | 49 | 5995.317  | 0.050680637 |
| 162 | Tnnt2  | 49 | 11237.011 | 0.05054945  |
| 163 | Lum    | 49 | 9183.736  | 0.05033557  |
| 164 | Fcgr1  | 49 | 2786.868  | 0.05021103  |
| 165 | Fbn1   | 49 | 4005.4172 | 0.05008226  |
| 166 | Ccr5   | 48 | 1623.3716 | 0.05043368  |
| 167 | Csf3   | 47 | 11951.709 | 0.050470572 |
| 168 | Ccne2  | 47 | 1487.0514 | 0.050009664 |
| 169 | Cip2a  | 47 | 7.011918  | 0.04978834  |
| 170 | Casq2  | 47 | 3964.341  | 0.049640287 |
| 171 | Tnni3  | 46 | 14523.068 | 0.050631054 |
| 172 | Arg1   | 46 | 7668.827  | 0.05054945  |
| 173 | Foxp3  | 45 | 3271.5625 | 0.05058651  |
| 174 | Fcgr2b | 45 | 1283.4568 | 0.05045089  |

---

---

|     |          |    |            |             |
|-----|----------|----|------------|-------------|
| 175 | Col5a1   | 45 | 3350.933   | 0.04997827  |
| 176 | Gas2l3   | 45 | 15.895663  | 0.049208388 |
| 177 | Cd80     | 44 | 3798.6685  | 0.05045089  |
| 178 | Cx3cr1   | 44 | 1712.7384  | 0.05041403  |
| 179 | Col5a2   | 44 | 1233.6812  | 0.04988192  |
| 180 | Ckm      | 44 | 2266.067   | 0.049721368 |
| 181 | Nppa     | 43 | 18469.91   | 0.050529707 |
| 182 | Cav3     | 42 | 10766.476  | 0.049893945 |
| 183 | Trdn     | 42 | 2684.1787  | 0.04964743  |
| 184 | Gen1     | 42 | 61.025265  | 0.04944819  |
| 185 | Pdcd1    | 41 | 6120.773   | 0.050428767 |
| 186 | Tnnc1    | 41 | 5559.84    | 0.05031844  |
| 187 | Pif1     | 41 | 106.529274 | 0.049415134 |
| 188 | Psrc1    | 41 | 1110.5499  | 0.049339753 |
| 189 | Myom2    | 40 | 4465.17    | 0.0501575   |
| 190 | C1qa     | 40 | 2381.794   | 0.049903568 |
| 191 | Hrc      | 40 | 6695.7876  | 0.04968318  |
| 192 | Ryr2     | 40 | 7357.1606  | 0.049642667 |
| 193 | Myl1     | 40 | 914.67566  | 0.049538124 |
| 194 | Dnali1   | 40 | 13056.268  | 0.049008    |
| 195 | Obscn    | 39 | 5142.195   | 0.04966649  |
| 196 | Hmox1    | 38 | 8254.404   | 0.05041403  |
| 197 | Lcn2     | 37 | 5292.9956  | 0.05024272  |
| 198 | C3ar1    | 37 | 2913.156   | 0.049949326 |
| 199 | Cxcl2    | 37 | 275.24155  | 0.049939685 |
| 200 | Haspin   | 37 | 0.3066943  | 0.049309194 |
| 201 | Cfap43   | 37 | 4602.686   | 0.048975535 |
| 202 | Cxcl13   | 36 | 1428.0392  | 0.05022809  |
| 203 | Thbs2    | 36 | 3506.5479  | 0.050101656 |
| 204 | Msr1     | 36 | 2616.2507  | 0.04995656  |
| 205 | Fcer1g   | 36 | 5092.789   | 0.049795527 |
| 206 | Scn5a    | 36 | 9957.031   | 0.04961887  |
| 207 | Ldb3     | 36 | 827.4212   | 0.04948838  |
| 208 | Lrguk    | 35 | 31945.791  | 0.050106507 |
| 209 | Itgb1bp2 | 35 | 1216.2965  | 0.04952627  |
| 210 | Lmod2    | 35 | 2552.3762  | 0.04947182  |
| 211 | Eme1     | 35 | 83.9941    | 0.049325645 |
| 212 | Clu      | 34 | 6562.4414  | 0.050250035 |
| 213 | Nos2     | 34 | 1884.0454  | 0.050179385 |
| 214 | Sparc    | 34 | 2223.9092  | 0.05007257  |
| 215 | Ccdc39   | 34 | 19874.41   | 0.04992764  |
| 216 | Trim54   | 34 | 2322.306   | 0.049512055 |
| 217 | Dnah1    | 34 | 1395.3427  | 0.048721932 |
| 218 | Ntrk2    | 33 | 23662.418  | 0.050289102 |

---

---

|     |           |    |           |             |
|-----|-----------|----|-----------|-------------|
| 219 | Dnah5     | 33 | 18825.629 | 0.050029002 |
| 220 | C1qc      | 33 | 1324.3347 | 0.049723756 |
| 221 | Smpx      | 33 | 197.45474 | 0.049497847 |
| 222 | Tnni1     | 33 | 866.52844 | 0.049493115 |
| 223 | Bard1     | 33 | 2936.6643 | 0.049412776 |
| 224 | Srl       | 33 | 1051.1355 | 0.049372703 |
| 225 | Mdk       | 32 | 4672.4004 | 0.050645918 |
| 226 | Slc2a4    | 32 | 10340.17  | 0.050487805 |
| 227 | Il2ra     | 32 | 646.13306 | 0.050179385 |
| 228 | Pgam2     | 32 | 9237.965  | 0.049721368 |
| 229 | Mypn      | 32 | 1312.5127 | 0.04949548  |
| 230 | Atp2a1    | 32 | 2921.1936 | 0.04946     |
| 231 | Myl4      | 32 | 1510.2985 | 0.0492998   |
| 232 | Tubb3     | 31 | 40212.633 | 0.05102544  |
| 233 | Serpinb1c | 31 | 3520.0251 | 0.050561797 |
| 234 | Serpinb9b | 31 | 3520.0251 | 0.050561797 |
| 235 | Sost      | 31 | 6403.0645 | 0.050055616 |
| 236 | Xirp1     | 31 | 5734.603  | 0.04950495  |
| 237 | Drc1      | 31 | 7215.067  | 0.0494411   |
| 238 | Sln       | 31 | 1947.4889 | 0.049434017 |
| 239 | Pln       | 31 | 2281.3577 | 0.04940098  |
| 240 | Dnah6     | 31 | 1744.1396 | 0.048984807 |
| 241 | Spef2     | 31 | 1219.5763 | 0.048721932 |
| 242 | Ahsg      | 30 | 6607.581  | 0.050181817 |
| 243 | Vcan      | 30 | 4457.957  | 0.049819496 |
| 244 | Ccl6      | 30 | 414.4746  | 0.049668875 |
| 245 | Txlnb     | 30 | 5595.6274 | 0.049342107 |
| 246 | Mybpc3    | 30 | 225.5929  | 0.049337402 |
| 247 | Myl7      | 30 | 1390.0392 | 0.049330346 |
| 248 | Cd276     | 29 | 2530.6594 | 0.050409116 |
| 249 | Ctsk      | 29 | 4330.321  | 0.050340466 |
| 250 | Gria1     | 29 | 17422.748 | 0.049795527 |
| 251 | Ccl9      | 29 | 315.00168 | 0.049738094 |
| 252 | Cox6a2    | 29 | 3401.2349 | 0.049733315 |
| 253 | C1qb      | 29 | 420.33173 | 0.049514424 |
| 254 | Dnaic2    | 29 | 9627.803  | 0.049382128 |
| 255 | Mybpc2    | 29 | 429.4444  | 0.049377415 |
| 256 | Armc4     | 29 | 3578.577  | 0.049194355 |
| 257 | Dnah12    | 29 | 6545.346  | 0.04874947  |
| 258 | Ar        | 28 | 6989.677  | 0.050519843 |
| 259 | Foxj1     | 28 | 28038.215 | 0.050237842 |
| 260 | Ogn       | 28 | 1949.4523 | 0.049845885 |
| 261 | Slc11a1   | 28 | 2899.4512 | 0.04982669  |
| 262 | Ccl12     | 28 | 201.52986 | 0.049800318 |

---

---

|     |          |    |           |             |
|-----|----------|----|-----------|-------------|
| 263 | Diaph3   | 28 | 1107.9861 | 0.049486015 |
| 264 | Dnaaf1   | 28 | 1491.9396 | 0.04888763  |
| 265 | Dnah10   | 28 | 2298.3013 | 0.048628077 |
| 266 | Dnah2    | 28 | 879.03625 | 0.048414256 |
| 267 | Itga2b   | 27 | 6565.208  | 0.05019642  |
| 268 | Fmod     | 27 | 1410.7465 | 0.04992764  |
| 269 | Trim63   | 27 | 6733.6772 | 0.049759615 |
| 270 | Cfap74   | 27 | 2033.7118 | 0.04847548  |
| 271 | Tnfrsf9  | 26 | 1307.2455 | 0.05013563  |
| 272 | Plau     | 26 | 7384.086  | 0.050079837 |
| 273 | Fcgr4    | 26 | 162.30206 | 0.04990116  |
| 274 | Col12a1  | 26 | 606.4206  | 0.049573716 |
| 275 | Ak7      | 26 | 9674.693  | 0.04952864  |
| 276 | Rsph4a   | 26 | 6029.891  | 0.049493115 |
| 277 | Mfap5    | 26 | 418.6298  | 0.049398627 |
| 278 | Cfap44   | 26 | 10257.78  | 0.04904516  |
| 279 | Retn     | 25 | 1619.625  | 0.05015507  |
| 280 | Fabp4    | 25 | 3447.2175 | 0.05012835  |
| 281 | Spag17   | 25 | 16999.682 | 0.049889136 |
| 282 | Il1rn    | 25 | 163.78043 | 0.04984829  |
| 283 | Ccr8     | 25 | 80.57228  | 0.049676027 |
| 284 | Nsl1     | 25 | 6168.9395 | 0.049309194 |
| 285 | Nkx2-5   | 25 | 1871.8352 | 0.049278673 |
| 286 | Hydin    | 25 | 3252.3474 | 0.04922711  |
| 287 | Cfap161  | 25 | 12627.434 | 0.04854141  |
| 288 | Serpine2 | 24 | 26924.643 | 0.050507516 |
| 289 | Fbn2     | 24 | 6818.118  | 0.050477955 |
| 290 | Fam20c   | 24 | 10550.424 | 0.05018912  |
| 291 | Saa3     | 24 | 855.535   | 0.04982909  |
| 292 | Slc17a7  | 24 | 5559.8325 | 0.049626008 |
| 293 | Pon1     | 23 | 14699.858 | 0.05020129  |
| 294 | Muc5b    | 23 | 24395.588 | 0.050048355 |
| 295 | Fbln2    | 23 | 1876.3601 | 0.049802713 |
| 296 | Clec4n   | 23 | 1364.7139 | 0.04969272  |
| 297 | Ccl7     | 23 | 82.04503  | 0.049676027 |
| 298 | Col15a1  | 23 | 192.54518 | 0.049635526 |
| 299 | Plk5     | 23 | 596.241   | 0.04960698  |
| 300 | Col8a1   | 23 | 215.43597 | 0.049587965 |
| 301 | Dhrs7c   | 23 | 8160.7188 | 0.04946     |
| 302 | Col16a1  | 23 | 502.5727  | 0.04928102  |
| 303 | Aunip    | 23 | 7.8893    | 0.049248192 |
| 304 | Xirp2    | 23 | 219.45895 | 0.04891998  |
| 305 | Fgf23    | 22 | 7172.9375 | 0.050186686 |
| 306 | Cd200r1  | 22 | 5699.9116 | 0.049723756 |

---

---

|     |         |    |            |             |
|-----|---------|----|------------|-------------|
| 307 | Col17a1 | 22 | 4860.9053  | 0.04966649  |
| 308 | Fcna    | 22 | 1644.0542  | 0.0495239   |
| 309 | Fkbp10  | 22 | 3402.773   | 0.04946     |
| 310 | Syt1    | 22 | 4546.2856  | 0.049431656 |
| 311 | Ms4a6d  | 22 | 181.48236  | 0.04922945  |
| 312 | Rbfox3  | 21 | 6902.141   | 0.05050998  |
| 313 | Tnfrsf4 | 21 | 1137.6833  | 0.050045937 |
| 314 | Cfb     | 21 | 728.6481   | 0.04999517  |
| 315 | Osm     | 21 | 383.07663  | 0.04987231  |
| 316 | Cfp     | 21 | 1078.9995  | 0.049860295 |
| 317 | Col5a3  | 21 | 194.43758  | 0.04959034  |
| 318 | Kcnj3   | 21 | 4429.142   | 0.049217746 |
| 319 | Kif27   | 21 | 3284.341   | 0.04907539  |
| 320 | Dnah9   | 21 | 303.31268  | 0.04868755  |
| 321 | Maats1  | 21 | 4591.006   | 0.04835093  |
| 322 | Cfap65  | 21 | 5121.236   | 0.04833738  |
| 323 | Esr2    | 20 | 7603.4565  | 0.05075271  |
| 324 | Mycn    | 20 | 2803.4714  | 0.05026468  |
| 325 | Slc1a2  | 20 | 11501.699  | 0.050213467 |
| 326 | Cfd     | 20 | 1424.9843  | 0.049951736 |
| 327 | Mmp14   | 20 | 337.36307  | 0.049937278 |
| 328 | Adamts4 | 20 | 1017.34546 | 0.049867503 |
| 329 | P4ha3   | 20 | 6034.9463  | 0.049814697 |
| 330 | Cyp1a1  | 20 | 6968.1157  | 0.04971659  |
| 331 | Syn2    | 20 | 8678.879   | 0.049583215 |
| 332 | Ccl8    | 20 | 172.253    | 0.04955947  |
| 333 | Adamts2 | 20 | 116.55917  | 0.049264602 |
| 334 | Rbm20   | 20 | 25.506607  | 0.049185    |
| 335 | Cidec   | 20 | 5355.6914  | 0.049170982 |
| 336 | Cyp2f2  | 20 | 6197.3022  | 0.049140632 |
| 337 | Smyd1   | 20 | 364.21356  | 0.04909867  |
| 338 | Kcna2   | 20 | 4288.4766  | 0.048924603 |
| 339 | Ccdc146 | 20 | 1246.3788  | 0.048441447 |
| 340 | Ttc21a  | 20 | 364.07544  | 0.047841363 |
| 341 | Pck1    | 19 | 12762.487  | 0.05030377  |
| 342 | Lif     | 19 | 1612.9138  | 0.05018912  |
| 343 | Calb2   | 19 | 14366.04   | 0.050133206 |
| 344 | Tubb1   | 19 | 8578.108   | 0.050055616 |
| 345 | Mgp     | 19 | 1175.6803  | 0.049807508 |
| 346 | Retnla  | 19 | 194.8025   | 0.049764402 |
| 347 | Cd248   | 19 | 1601.3491  | 0.049621247 |
| 348 | Ltbp2   | 19 | 422.11267  | 0.04945055  |
| 349 | Col7a1  | 19 | 2402.6716  | 0.049417496 |
| 350 | Cidea   | 19 | 872.872    | 0.04936093  |

---



---

|     |         |    |            |             |
|-----|---------|----|------------|-------------|
| 351 | Cox8b   | 19 | 2313.766   | 0.049356222 |
| 352 | Kcna1   | 19 | 3662.6963  | 0.049168646 |
| 353 | Art1    | 19 | 157.04236  | 0.04905446  |
| 354 | Xrcc3   | 19 | 11.49825   | 0.04903354  |
| 355 | Kifc2   | 19 | 2.5112154  | 0.04846867  |
| 356 | Ppbp    | 18 | 1390.0374  | 0.05017452  |
| 357 | Igfbp3  | 18 | 737.09827  | 0.05015507  |
| 358 | Tigit   | 18 | 884.0517   | 0.050096806 |
| 359 | Itgb6   | 18 | 3352.1584  | 0.04982429  |
| 360 | Cxcl3   | 18 | 18.58584   | 0.04960698  |
| 361 | Alpk3   | 18 | 59.032295  | 0.048966266 |
| 362 | Cfap47  | 18 | 225.70705  | 0.048466403 |
| 363 | Cbs     | 17 | 13475.615  | 0.05022809  |
| 364 | Fst     | 17 | 2782.092   | 0.04992764  |
| 365 | Il11    | 17 | 152.1064   | 0.049841087 |
| 366 | Col24a1 | 17 | 35.125854  | 0.049080044 |
| 367 | P3h1    | 17 | 28.079355  | 0.04907772  |
| 368 | Myo18b  | 17 | 661.20654  | 0.049017288 |
| 369 | Adprh1  | 17 | 2817.2715  | 0.048996404 |
| 370 | Cfap54  | 17 | 944.04254  | 0.04864636  |
| 371 | Cfap58  | 17 | 353.1566   | 0.0481015   |
| 372 | Ccdc81  | 17 | 1069.1906  | 0.048094794 |
| 373 | Aldh1a1 | 16 | 15586.965  | 0.050347812 |
| 374 | Ank1    | 16 | 12864.0625 | 0.05012835  |
| 375 | Batf3   | 16 | 1887.5577  | 0.04996138  |
| 376 | Tgfb1   | 16 | 1846.9889  | 0.04959034  |
| 377 | Eno4    | 16 | 15904.846  | 0.049540494 |
| 378 | Fabp3   | 16 | 2925.884   | 0.04945055  |
| 379 | Sfrp2   | 16 | 3256.457   | 0.049325645 |
| 380 | Tbx20   | 16 | 1771.5911  | 0.049266946 |
| 381 | Zmynd10 | 16 | 787.34784  | 0.048719637 |
| 382 | Cfap221 | 16 | 3844.739   | 0.048466403 |
| 383 | Dnah3   | 16 | 56.772736  | 0.048204556 |
| 384 | Wdr66   | 16 | 28.889523  | 0.047704645 |
| 385 | Nog     | 15 | 3526.84    | 0.050286658 |
| 386 | Eef1a2  | 15 | 2879.0593  | 0.05024028  |
| 387 | Eno1b   | 15 | 10862.165  | 0.050232965 |
| 388 | Fstl1   | 15 | 298.118    | 0.049869906 |
| 389 | Lilrb4a | 15 | 105.788445 | 0.049836285 |
| 390 | Nrxn2   | 15 | 3992.8699  | 0.04971898  |
| 391 | Adrb3   | 15 | 388.3233   | 0.04970704  |
| 392 | Orm1    | 15 | 5283.0874  | 0.049664106 |
| 393 | Pirb    | 15 | 1103.7675  | 0.049640287 |
| 394 | Ppp2r2b | 15 | 13135.662  | 0.049583215 |

---

---

|     |           |    |            |             |
|-----|-----------|----|------------|-------------|
| 395 | Il23a     | 15 | 164.27802  | 0.049538124 |
| 396 | Loxl3     | 15 | 46.500675  | 0.049474187 |
| 397 | Plin1     | 15 | 580.3671   | 0.049091686 |
| 398 | Cfi       | 15 | 832.95654  | 0.049080044 |
| 399 | Col28a1   | 15 | 0          | 0.049059108 |
| 400 | Pcolce2   | 15 | 1308.3812  | 0.04900104  |
| 401 | Cacna1b   | 15 | 4947.1445  | 0.048926916 |
| 402 | Cyp2a5    | 15 | 2602.2063  | 0.048728812 |
| 403 | Cyp2s1    | 15 | 3648.2769  | 0.048653223 |
| 404 | Hamp      | 14 | 1474.2496  | 0.050123494 |
| 405 | Cd46      | 14 | 10181.613  | 0.050111357 |
| 406 | Fndc5     | 14 | 767.32465  | 0.04989154  |
| 407 | Serpina3n | 14 | 530.69214  | 0.04987231  |
| 408 | Efhb      | 14 | 12138.14   | 0.04971898  |
| 409 | Reg3g     | 14 | 3226.0698  | 0.049714204 |
| 410 | Loxl2     | 14 | 37.456924  | 0.04946946  |
| 411 | Lama1     | 14 | 1361.5022  | 0.04946473  |
| 412 | Dmpl      | 14 | 372.9363   | 0.04938684  |
| 413 | Ccdc80    | 14 | 637.5366   | 0.049318593 |
| 414 | Tnxb      | 14 | 1029.1464  | 0.0492998   |
| 415 | Ttc25     | 14 | 3753.0288  | 0.049175654 |
| 416 | Rmi2      | 14 | 0.82269543 | 0.04902193  |
| 417 | Mylk3     | 14 | 886.0548   | 0.048922293 |
| 418 | Kenc1     | 14 | 1753.5017  | 0.048731107 |
| 419 | Cfap57    | 14 | 1459.654   | 0.048507288 |
| 420 | Cfap206   | 14 | 324.00943  | 0.048269752 |
| 421 | S100a4    | 13 | 2199.585   | 0.05021834  |
| 422 | Aldh3a1   | 13 | 5774.934   | 0.05017452  |
| 423 | ErbB4     | 13 | 6008.771   | 0.05001933  |
| 424 | Pgf       | 13 | 472.22577  | 0.049963795 |
| 425 | Bmp6      | 13 | 1102.9337  | 0.049762007 |
| 426 | Tnc       | 13 | 284.07755  | 0.049533382 |
| 427 | Ccl21a    | 13 | 83.62678   | 0.049512055 |
| 428 | Enpp1     | 13 | 5989.738   | 0.04948838  |
| 429 | Cox7a1    | 13 | 1061.1401  | 0.049476553 |
| 430 | Trem1     | 13 | 4395.443   | 0.04943638  |
| 431 | Lair1     | 13 | 555.3868   | 0.049422212 |
| 432 | Car3      | 13 | 1205.0685  | 0.049417496 |
| 433 | Slc18a2   | 13 | 5569.3423  | 0.049398627 |
| 434 | F10       | 13 | 936.6057   | 0.049325645 |
| 435 | Aox3      | 13 | 3791.1902  | 0.04918033  |
| 436 | P2ry6     | 13 | 4218.716   | 0.049126636 |
| 437 | Scgb3a2   | 13 | 7604.319   | 0.04906376  |
| 438 | Gsta3     | 13 | 1094.95    | 0.048938483 |

---

---

|     |          |    |            |             |
|-----|----------|----|------------|-------------|
| 439 | Ms4a7    | 13 | 47.680183  | 0.04893617  |
| 440 | Kcnj5    | 13 | 1946.1139  | 0.048878394 |
| 441 | Cd300c2  | 13 | 1148.4812  | 0.04880924  |
| 442 | Srcin1   | 13 | 5562.008   | 0.04875636  |
| 443 | Cyp7b1   | 13 | 2256.8997  | 0.048751768 |
| 444 | Sntn     | 13 | 2485.7292  | 0.048676103 |
| 445 | Mtfr2    | 13 | 3.5155203  | 0.048459593 |
| 446 | Wnt10b   | 13 | 966.01544  | 0.048432384 |
| 447 | Scn1b    | 13 | 3967.9163  | 0.04839162  |
| 448 | Dnah7c   | 13 | 5.0695577  | 0.048141774 |
| 449 | Scgb1a1  | 12 | 5359.437   | 0.050311103 |
| 450 | Has2     | 12 | 2272.483   | 0.05011621  |
| 451 | Aicda    | 12 | 1276.847   | 0.05011621  |
| 452 | Fgfr4    | 12 | 3674.5845  | 0.049862698 |
| 453 | Ptx3     | 12 | 127.076256 | 0.049611736 |
| 454 | Gp9      | 12 | 1593.1296  | 0.04960698  |
| 455 | Mpl      | 12 | 416.76996  | 0.049602225 |
| 456 | Card9    | 12 | 2429.3604  | 0.0495239   |
| 457 | Plp1     | 12 | 6562.5464  | 0.049422212 |
| 458 | Bpifb1   | 12 | 2860.3645  | 0.049342107 |
| 459 | Omd      | 12 | 298.57166  | 0.049208388 |
| 460 | Atp2b2   | 12 | 4182.121   | 0.049101003 |
| 461 | Kcnj10   | 12 | 2266.1394  | 0.048996404 |
| 462 | Zranb3   | 12 | 1.3234528  | 0.04890842  |
| 463 | Mxd3     | 12 | 11.481424  | 0.048685264 |
| 464 | Fam183b  | 12 | 3398.5273  | 0.048532307 |
| 465 | Cyp4a12b | 12 | 2463.9946  | 0.04852776  |
| 466 | Ugt2b5   | 12 | 1797.2244  | 0.048500467 |
| 467 | Tmem212  | 12 | 1697.7462  | 0.048500467 |
| 468 | Myl6b    | 12 | 94.11077   | 0.048423316 |
| 469 | Ctsd     | 11 | 438.71265  | 0.050206162 |
| 470 | Adrb2    | 11 | 4019.9587  | 0.04999034  |
| 471 | Gsn      | 11 | 1983.1099  | 0.049966205 |
| 472 | Hjv      | 11 | 1924.913   | 0.049898755 |
| 473 | Ereg     | 11 | 1112.2866  | 0.049695108 |
| 474 | Foxa1    | 11 | 7244.861   | 0.04969272  |
| 475 | Ffar2    | 11 | 4659.384   | 0.049626008 |
| 476 | Gp5      | 11 | 1420.3872  | 0.049623627 |
| 477 | Pyy      | 11 | 954.1943   | 0.049611736 |
| 478 | Cntn1    | 11 | 4298.1333  | 0.049602225 |
| 479 | Ccn4     | 11 | 1591.3481  | 0.04937977  |
| 480 | Ppic     | 11 | 183.64482  | 0.04911498  |
| 481 | Bpifal   | 11 | 1471.2802  | 0.0489038   |
| 482 | Hpgds    | 11 | 914.59106  | 0.0488461   |

---

---

|     |           |    |            |             |
|-----|-----------|----|------------|-------------|
| 483 | Gsta2     | 11 | 639.3658   | 0.0488461   |
| 484 | Traip     | 11 | 122.75342  | 0.048735697 |
| 485 | Atp1a2    | 11 | 3249.5186  | 0.048719637 |
| 486 | Cyp4b1    | 11 | 1012.39185 | 0.04851638  |
| 487 | Yipf7     | 11 | 25.203516  | 0.04842105  |
| 488 | Casc1     | 11 | 15.961657  | 0.04806799  |
| 489 | Cnn1      | 10 | 2364.9253  | 0.05015993  |
| 490 | Trp73     | 10 | 1900.0072  | 0.049833886 |
| 491 | Slc40a1   | 10 | 413.52527  | 0.04975005  |
| 492 | Lgals4    | 10 | 3846.3894  | 0.049626008 |
| 493 | Pth1r     | 10 | 461.7891   | 0.049552355 |
| 494 | mt-Nd3    | 10 | 2531.2866  | 0.049516793 |
| 495 | Tff2      | 10 | 7152.121   | 0.049462367 |
| 496 | Il24      | 10 | 23.828508  | 0.049431656 |
| 497 | Ppp1r1b   | 10 | 2380.5286  | 0.04940098  |
| 498 | Pitx2     | 10 | 8302.589   | 0.049335048 |
| 499 | Tmem26    | 10 | 473.01794  | 0.04901961  |
| 500 | Ferls     | 10 | 23.781322  | 0.048931543 |
| 501 | Gstm1     | 10 | 574.1332   | 0.048839185 |
| 502 | Scgb3a1   | 10 | 672.44653  | 0.04881615  |
| 503 | Serpina10 | 10 | 7316.212   | 0.04864636  |
| 504 | Clec4a2   | 10 | 31.217379  | 0.048632648 |
| 505 | Cfap157   | 10 | 747.2702   | 0.048500467 |
| 506 | Sfrp1     | 10 | 521.71045  | 0.04847321  |
| 507 | Wnt2b     | 10 | 142.88252  | 0.047961075 |
| 508 | Ccdc13    | 10 | 215.27357  | 0.04790558  |
| 509 | Msln      | 9  | 1071.7887  | 0.05001933  |
| 510 | Psat1     | 9  | 5560.7715  | 0.049754832 |
| 511 | Ch25h     | 9  | 2177.963   | 0.049673643 |
| 512 | Tnfrsf11b | 9  | 240.27753  | 0.049654577 |
| 513 | Olr1      | 9  | 63.448475  | 0.049614113 |
| 514 | Inhba     | 9  | 561.2735   | 0.049599845 |
| 515 | Orm2      | 9  | 123.99701  | 0.049521532 |
| 516 | Ctsh      | 9  | 287.966    | 0.049452912 |
| 517 | Cldn4     | 9  | 7044.361   | 0.04944346  |
| 518 | Lgmn      | 9  | 220.0904   | 0.049241163 |
| 519 | Apol9a    | 9  | 1296.7722  | 0.04920137  |
| 520 | Lrg1      | 9  | 643.53906  | 0.04916631  |
| 521 | Sgcg      | 9  | 152.91039  | 0.04903122  |
| 522 | Sulfl     | 9  | 29.284393  | 0.049014963 |
| 523 | Prrx2     | 9  | 846.2934   | 0.04901032  |
| 524 | Cda       | 9  | 1448.0242  | 0.04899872  |
| 525 | Pgm5      | 9  | 933.2786   | 0.048945427 |
| 526 | Mybphl    | 9  | 1006.0591  | 0.048917666 |

---

---

|     |               |   |           |             |
|-----|---------------|---|-----------|-------------|
| 527 | Apol7c        | 9 | 2814.276  | 0.04889225  |
| 528 | Slc12a5       | 9 | 90.280525 | 0.048790835 |
| 529 | Spag16        | 9 | 896.5738  | 0.04877934  |
| 530 | Clec5a        | 9 | 20.762953 | 0.048648648 |
| 531 | Plin4         | 9 | 231.60161 | 0.04863722  |
| 532 | Rgs4          | 9 | 4966.1    | 0.048621222 |
| 533 | Adh7          | 9 | 130.88374 | 0.048436914 |
| 534 | Ddias         | 9 | 419.6291  | 0.04841199  |
| 535 | Pax9          | 9 | 3104.6147 | 0.048402935 |
| 536 | Dkk2          | 9 | 468.45224 | 0.048269752 |
| 537 | 1700028P14Rik | 9 | 496.6076  | 0.048249498 |
| 538 | Iqub          | 9 | 2276.742  | 0.04814625  |
| 539 | Saxo2         | 9 | 2205.5115 | 0.047845785 |
| 540 | Scn3a         | 9 | 286.67755 | 0.04779276  |
| 541 | Hmga2         | 8 | 287.93182 | 0.049845885 |
| 542 | Timp4         | 8 | 9.604253  | 0.049740486 |
| 543 | Mapk10        | 8 | 2695.4888 | 0.049661726 |
| 544 | Tdo2          | 8 | 1706.7672 | 0.049609356 |
| 545 | Gli2          | 8 | 1616.4741 | 0.04955947  |
| 546 | Il22ra2       | 8 | 7.813943  | 0.049476553 |
| 547 | Csf2rb2       | 8 | 7.813943  | 0.049476553 |
| 548 | Ak5           | 8 | 6755.967  | 0.04937977  |
| 549 | Atp7b         | 8 | 760.11346 | 0.049377415 |
| 550 | Adgrv1        | 8 | 3298.416  | 0.049236476 |
| 551 | Sh3gl2        | 8 | 1442.1298 | 0.049234137 |
| 552 | Slc7a5        | 8 | 2393.5051 | 0.04919903  |
| 553 | Mycbpap       | 8 | 7046.3564 | 0.049121976 |
| 554 | Nrcam         | 8 | 3236.102  | 0.0490847   |
| 555 | Chad          | 8 | 161.7648  | 0.049008    |
| 556 | Itih3         | 8 | 1092.492  | 0.048917666 |
| 557 | Marco         | 8 | 499.63004 | 0.048894558 |
| 558 | Cd51          | 8 | 49.22553  | 0.048717346 |
| 559 | Tnr           | 8 | 613.45776 | 0.048689842 |
| 560 | Adamts12      | 8 | 18.127678 | 0.048678394 |
| 561 | Thrsp         | 8 | 4073.4111 | 0.04863493  |
| 562 | Sfrp5         | 8 | 1182.1675 | 0.048539136 |
| 563 | Nme9          | 8 | 212.0984  | 0.04826075  |
| 564 | Iqca          | 8 | 845.13873 | 0.048227016 |
| 565 | Spata18       | 8 | 350.1688  | 0.048139535 |
| 566 | Cyp2d22       | 8 | 422.39496 | 0.048010018 |
| 567 | 1700001C02Rik | 8 | 734.4182  | 0.04793442  |
| 568 | 2310002L09Rik | 8 | 10.470971 | 0.04791223  |
| 569 | Kcnj11        | 8 | 301.7411  | 0.0478657   |
| 570 | Wnt6          | 8 | 13.506507 | 0.047590584 |

---

---

|     |           |   |           |             |
|-----|-----------|---|-----------|-------------|
| 571 | Ccdc33    | 8 | 34.074043 | 0.047187015 |
| 572 | Bche      | 7 | 3012.9614 | 0.049702268 |
| 573 | Ubd       | 7 | 239.88242 | 0.049429294 |
| 574 | Lgals1    | 7 | 856.07275 | 0.04939391  |
| 575 | Pdghc     | 7 | 2101.4639 | 0.04925288  |
| 576 | Gmnc      | 7 | 3555.9773 | 0.04924585  |
| 577 | Adgb      | 7 | 2789.7588 | 0.049159303 |
| 578 | Cilp      | 7 | 64.37633  | 0.04905446  |
| 579 | Adamts7   | 7 | 2115.5083 | 0.04898249  |
| 580 | F5        | 7 | 858.04565 | 0.048980173 |
| 581 | Gal       | 7 | 2236.2534 | 0.048961636 |
| 582 | Spdef     | 7 | 1491.5475 | 0.048961636 |
| 583 | Cdhr3     | 7 | 3450.634  | 0.048945427 |
| 584 | Ms4a6c    | 7 | 24.914356 | 0.04887378  |
| 585 | Grem1     | 7 | 146.24844 | 0.048710465 |
| 586 | Arhgap19  | 7 | 0         | 0.048696715 |
| 587 | Bdkrb1    | 7 | 187.75768 | 0.048660085 |
| 588 | Rgs22     | 7 | 1808.7008 | 0.048650935 |
| 589 | B3gnt4    | 7 | 943.9922  | 0.04863036  |
| 590 | Slc5a1    | 7 | 2302.9565 | 0.048609808 |
| 591 | Wfdc17    | 7 | 32.22825  | 0.048598394 |
| 592 | Ect2l     | 7 | 4740.497  | 0.048575584 |
| 593 | Acvr1c    | 7 | 129.49976 | 0.048511837 |
| 594 | Frzb      | 7 | 142.02417 | 0.048498195 |
| 595 | Ulbp1     | 7 | 4068.9497 | 0.048418786 |
| 596 | Ldlrad1   | 7 | 624.284   | 0.048359968 |
| 597 | Kcnh3     | 7 | 2240.546  | 0.048314817 |
| 598 | F7        | 7 | 202.16809 | 0.04824275  |
| 599 | Ccdc180   | 7 | 207.03076 | 0.048164178 |
| 600 | Cfap299   | 7 | 3761.9626 | 0.048047908 |
| 601 | Jsrp1     | 7 | 23.266756 | 0.048001114 |
| 602 | Kcnn2     | 7 | 60.207485 | 0.04789006  |
| 603 | Tspoap1   | 7 | 196.5382  | 0.047834728 |
| 604 | Tmem182   | 7 | 140.49936 | 0.04781263  |
| 605 | Slc38a4   | 7 | 1617.1699 | 0.04765413  |
| 606 | Vwa3a     | 7 | 2278.147  | 0.047566526 |
| 607 | Ptger3    | 6 | 3301.3284 | 0.04953575  |
| 608 | Ripk3     | 6 | 1575.7773 | 0.04943638  |
| 609 | Serpina3i | 6 | 91.04821  | 0.049389195 |
| 610 | Pdia2     | 6 | 2434.3464 | 0.049311545 |
| 611 | Ngb       | 6 | 659.7424  | 0.04916164  |
| 612 | Tnni3k    | 6 | 2167.4585 | 0.0491523   |
| 613 | Mafb      | 6 | 601.5468  | 0.04911498  |
| 614 | Dspp      | 6 | 229.34053 | 0.04908703  |

---

---

|     |         |   |           |             |
|-----|---------|---|-----------|-------------|
| 615 | Mlxipl  | 6 | 44.614517 | 0.04882306  |
| 616 | Cd109   | 6 | 1686.7235 | 0.048735697 |
| 617 | Ppp2r2c | 6 | 623.5608  | 0.048669238 |
| 618 | Pde4c   | 6 | 500.75345 | 0.048621222 |
| 619 | Ces1f   | 6 | 642.9184  | 0.048612088 |
| 620 | Shank2  | 6 | 186.76064 | 0.04843465  |
| 621 | Tnfsf18 | 6 | 0         | 0.04841652  |
| 622 | Gjb6    | 6 | 1128.6914 | 0.04834641  |
| 623 | Dctd    | 6 | 29.01047  | 0.04830354  |
| 624 | Rgs5    | 6 | 2443.6902 | 0.04829002  |
| 625 | Pdyn    | 6 | 268.721   | 0.04829002  |
| 626 | Lypd2   | 6 | 2658.1958 | 0.048229262 |
| 627 | Asb14   | 6 | 2699.5837 | 0.04816642  |
| 628 | Fmo3    | 6 | 718.1803  | 0.048157454 |
| 629 | Six1    | 6 | 3252.0273 | 0.048070226 |
| 630 | Ppp4r4  | 6 | 11415.752 | 0.047996663 |
| 631 | Hcn1    | 6 | 36.292355 | 0.047878984 |
| 632 | Cyp4f15 | 6 | 29.422012 | 0.04783915  |
| 633 | Cfap77  | 6 | 0         | 0.04778173  |
| 634 | Kcna6   | 6 | 8.598988  | 0.04768706  |
| 635 | Atp2c2  | 6 | 4075.9912 | 0.04763439  |
| 636 | Rgs9    | 6 | 1236.4647 | 0.047505394 |
| 637 | Kent1   | 6 | 1080.4353 | 0.04739879  |
| 638 | Cdh3    | 5 | 2655.3481 | 0.049757224 |
| 639 | Amy1    | 5 | 185.28136 | 0.04954761  |
| 640 | Gdf11   | 5 | 113.94091 | 0.049540494 |
| 641 | Ticam2  | 5 | 15.028373 | 0.04944346  |
| 642 | Fscn1   | 5 | 1258.5984 | 0.049335048 |
| 643 | Twist2  | 5 | 5550.7803 | 0.04930215  |
| 644 | Mlip    | 5 | 639.1235  | 0.049241163 |
| 645 | Fbxl13  | 5 | 1144.8541 | 0.048950057 |
| 646 | Bcat1   | 5 | 166.08984 | 0.04881615  |
| 647 | Tymp    | 5 | 209.49715 | 0.048770145 |
| 648 | Lgr6    | 5 | 432.94897 | 0.04875636  |
| 649 | Chrdl1  | 5 | 306.671   | 0.048632648 |
| 650 | Mgl2    | 5 | 3.325133  | 0.04862351  |
| 651 | Slc47a1 | 5 | 2637.1816 | 0.04853686  |
| 652 | Ednrb   | 5 | 482.5576  | 0.048511837 |
| 653 | Inmt    | 5 | 2652.7546 | 0.04850956  |
| 654 | Sh3gl3  | 5 | 64.299675 | 0.048495922 |
| 655 | Scgb1c1 | 5 | 1384.7174 | 0.04846413  |
| 656 | Adcy8   | 5 | 728.0178  | 0.048443716 |
| 657 | Gdf6    | 5 | 36.753296 | 0.04843465  |
| 658 | Fank1   | 5 | 1577.998  | 0.048418786 |

---

---

|     |        |   |            |             |
|-----|--------|---|------------|-------------|
| 659 | Pde8b  | 5 | 117.220345 | 0.048393883 |
| 660 | Kynu   | 5 | 1061.0748  | 0.04838936  |
| 661 | Cd84   | 5 | 287.9954   | 0.048357707 |
| 662 | Erfe   | 5 | 6.618303   | 0.04831933  |
| 663 | Cbr2   | 5 | 149.87766  | 0.0482585   |
| 664 | Smoc1  | 5 | 761.4771   | 0.048220277 |
| 665 | Nr5a2  | 5 | 961.37604  | 0.048215784 |
| 666 | Cacng5 | 5 | 785.0562   | 0.048215784 |
| 667 | Nrtn   | 5 | 241.80574  | 0.048094794 |
| 668 | Nrn1   | 5 | 593.1323   | 0.04809256  |
| 669 | Lrrtm2 | 5 | 53.700027  | 0.048079155 |
| 670 | Lingo1 | 5 | 255.54955  | 0.048056833 |
| 671 | Fut2   | 5 | 1348.6621  | 0.04797664  |
| 672 | Mest   | 5 | 2117.4446  | 0.047901142 |
| 673 | Fitm1  | 5 | 93.702484  | 0.047836937 |
| 674 | Stx1b  | 5 | 253.4865   | 0.047779523 |
| 675 | Ppfia4 | 5 | 0          | 0.047693655 |
| 676 | Shisa9 | 5 | 1418.502   | 0.047610287 |
| 677 | Abcc8  | 5 | 1548.3077  | 0.047577456 |
| 678 | Ttl9   | 5 | 335.3514   | 0.047485776 |
| 679 | Lrrc36 | 5 | 4603.3486  | 0.047383603 |
| 680 | Zdbf2  | 5 | 346.96686  | 0.047041178 |
| 681 | Ubxn10 | 5 | 366.94864  | 0.04702408  |
| 682 | Rgs16  | 5 | 133.00708  | 0.046908993 |
| 683 | Dlec1  | 5 | 0          | 0.046699453 |
| 684 | Dthd1  | 5 | 4203.812   | 0.046477165 |
| 685 | Nr3c2  | 4 | 30.47533   | 0.049656957 |
| 686 | Mdga1  | 4 | 503.537    | 0.049422212 |
| 687 | Dstamp | 4 | 265.15393  | 0.049410418 |
| 688 | Defb1  | 4 | 551.5303   | 0.049295105 |
| 689 | Adam12 | 4 | 2034       | 0.049241163 |
| 690 | Etv4   | 4 | 6.650761   | 0.04890842  |
| 691 | Gatm   | 4 | 196.98616  | 0.048866857 |
| 692 | Megf11 | 4 | 2430.8     | 0.04883227  |
| 693 | Tfap2a | 4 | 4082.754   | 0.048772443 |
| 694 | Shc4   | 4 | 185.00545  | 0.048689842 |
| 695 | Ackr4  | 4 | 0.22103387 | 0.048571028 |
| 696 | Clcn5  | 4 | 1884.1268  | 0.048520934 |
| 697 | Inha   | 4 | 28.17514   | 0.04850956  |
| 698 | Slc7a8 | 4 | 695.8217   | 0.04847094  |
| 699 | Fmo2   | 4 | 1303.097   | 0.04845052  |
| 700 | Synm   | 4 | 17.100363  | 0.048445985 |
| 701 | Klf15  | 4 | 429.8016   | 0.04842105  |
| 702 | Gas7   | 4 | 0.469401   | 0.04839162  |

---



---

|     |           |   |            |             |
|-----|-----------|---|------------|-------------|
| 703 | Kdelr3    | 4 | 808.0741   | 0.04833061  |
| 704 | Dpep1     | 4 | 458.72327  | 0.04832835  |
| 705 | Chsy3     | 4 | 361.47256  | 0.048308052 |
| 706 | Dbn1      | 4 | 188.36719  | 0.04829678  |
| 707 | Asgr1     | 4 | 551.58575  | 0.048294526 |
| 708 | Hal       | 4 | 756.5528   | 0.048287768 |
| 709 | Nckap1    | 4 | 75.018295  | 0.04828326  |
| 710 | Spsb4     | 4 | 965.53754  | 0.048245    |
| 711 | Tnfrsf11a | 4 | 7.379395   | 0.048231512 |
| 712 | Grtp1     | 4 | 783.0343   | 0.048220277 |
| 713 | Ces1e     | 4 | 120.71444  | 0.04821803  |
| 714 | Slc7a10   | 4 | 540.07855  | 0.048204556 |
| 715 | Hmgcs2    | 4 | 126.99745  | 0.04819782  |
| 716 | Dusp27    | 4 | 3472.3481  | 0.048161935 |
| 717 | Dnmt3l    | 4 | 1365.8951  | 0.048150733 |
| 718 | Mpig6b    | 4 | 10.1334715 | 0.048135057 |
| 719 | BC030867  | 4 | 0          | 0.0481015   |
| 720 | Adora1    | 4 | 329.96222  | 0.048056833 |
| 721 | Malt1     | 4 | 8.407948   | 0.048036758 |
| 722 | Spata17   | 4 | 48.793583  | 0.047996663 |
| 723 | Fam81b    | 4 | 348.99146  | 0.04798776  |
| 724 | Cdh19     | 4 | 223.4666   | 0.047985535 |
| 725 | Gfra3     | 4 | 117.011444 | 0.047947746 |
| 726 | Ulk4      | 4 | 108.80405  | 0.047925543 |
| 727 | Bbox1     | 4 | 1332.5238  | 0.047856845 |
| 728 | Pcp4      | 4 | 3749.9087  | 0.047830306 |
| 729 | Tbx6      | 4 | 235.98518  | 0.047790553 |
| 730 | Cacna2d4  | 4 | 914.8168   | 0.04774646  |
| 731 | Gcnt4     | 4 | 6119.1807  | 0.047744256 |
| 732 | Plpp3     | 4 | 2283.5188  | 0.047742054 |
| 733 | Itpka     | 4 | 262.54776  | 0.047717843 |
| 734 | Cfap100   | 4 | 296.07886  | 0.04770025  |
| 735 | Slc4a5    | 4 | 2205.8943  | 0.047667295 |
| 736 | Gsg11     | 4 | 1364.5684  | 0.04754249  |
| 737 | Aldh1l2   | 4 | 2457.1877  | 0.04751848  |
| 738 | Glt1d1    | 4 | 2583.819   | 0.047511935 |
| 739 | Dok2      | 4 | 82.67843   | 0.047507573 |
| 740 | Unc80     | 4 | 2034       | 0.04745747  |
| 741 | Ugt8a     | 4 | 1465.0026  | 0.0474292   |
| 742 | Cd300lg   | 4 | 537.96246  | 0.047427025 |
| 743 | Gjb4      | 4 | 4.8550854  | 0.047383603 |
| 744 | Gjb3      | 4 | 4.8550854  | 0.047383603 |
| 745 | Gjb5      | 4 | 4.8550854  | 0.047383603 |
| 746 | P2ry14    | 4 | 140.70998  | 0.047346752 |

---

---

|     |          |   |           |             |
|-----|----------|---|-----------|-------------|
| 747 | Iglon5   | 4 | 4208.524  | 0.04730347  |
| 748 | Rgs11    | 4 | 0         | 0.046877123 |
| 749 | Ggt1     | 4 | 0         | 0.046705775 |
| 750 | Ano3     | 4 | 2191.826  | 0.04662162  |
| 751 | Sult1d1  | 4 | 2036.3344 | 0.046611123 |
| 752 | Cers3    | 4 | 4079.9475 | 0.046560798 |
| 753 | Ccdc170  | 4 | 44.410793 | 0.04636266  |
| 754 | Lrrc74b  | 4 | 467.26782 | 0.04448934  |
| 755 | Tmem173  | 3 | 1.3325359 | 0.04936564  |
| 756 | Cnksr2   | 3 | 398.09537 | 0.049309194 |
| 757 | Eda      | 3 | 687.2404  | 0.049217746 |
| 758 | Igfbp6   | 3 | 48.760277 | 0.048878394 |
| 759 | Plag1    | 3 | 27.238537 | 0.048662372 |
| 760 | S100a7a  | 3 | 16.897825 | 0.048662372 |
| 761 | Lrp8     | 3 | 2034      | 0.048555076 |
| 762 | Cideb    | 3 | 22.536768 | 0.048520934 |
| 763 | Adam3    | 3 | 6090      | 0.04846413  |
| 764 | Atp6v1b1 | 3 | 59.144703 | 0.048461862 |
| 765 | Cyt11    | 3 | 2250.1504 | 0.048396148 |
| 766 | Dzank1   | 3 | 3818.4907 | 0.04831256  |
| 767 | Tmem45b  | 3 | 2026.9213 | 0.048308052 |
| 768 | Adra1d   | 3 | 2039.8046 | 0.04829678  |
| 769 | Ky       | 3 | 543.49255 | 0.048231512 |
| 770 | Ntm      | 3 | 2097.9014 | 0.048179872 |
| 771 | Prima1   | 3 | 282.8435  | 0.04817763  |
| 772 | Acsm3    | 3 | 187.0771  | 0.048121627 |
| 773 | Ppp1r42  | 3 | 6094      | 0.048099265 |
| 774 | Tspan7   | 3 | 906.7403  | 0.048072457 |
| 775 | Syt10    | 3 | 63.526264 | 0.04805237  |
| 776 | Pycr1    | 3 | 364.61673 | 0.048041217 |
| 777 | Cep126   | 3 | 205.23872 | 0.048027843 |
| 778 | Cdh26    | 3 | 180.32138 | 0.048005566 |
| 779 | Wdr72    | 3 | 73.71866  | 0.048005566 |
| 780 | Sptb     | 3 | 39.649082 | 0.04798331  |
| 781 | Sptlc3   | 3 | 3085.9287 | 0.047967743 |
| 782 | Tppp3    | 3 | 442.9355  | 0.04795663  |
| 783 | Dok5     | 3 | 0         | 0.04793442  |
| 784 | Nkx2-9   | 3 | 72.6792   | 0.047894493 |
| 785 | Clca3a1  | 3 | 1712.6052 | 0.04780821  |
| 786 | Odaph    | 3 | 670.5675  | 0.047777317 |
| 787 | Wdr93    | 3 | 625.72833 | 0.04775527  |
| 788 | Chst4    | 3 | 745.2998  | 0.047750864 |
| 789 | Tmem232  | 3 | 2108.0508 | 0.04771564  |
| 790 | Lilr4b   | 3 | 2.2946925 | 0.047706846 |

---

---

|     |               |   |            |             |
|-----|---------------|---|------------|-------------|
| 791 | Bves          | 3 | 5.0617537  | 0.047669493 |
| 792 | Fsd2          | 3 | 0          | 0.047660712 |
| 793 | Ubxn11        | 3 | 2186.7922  | 0.047658518 |
| 794 | Upk2          | 3 | 1645.7432  | 0.047647547 |
| 795 | Tbxas1        | 3 | 66.976265  | 0.047566526 |
| 796 | Perm1         | 3 | 2034       | 0.047562152 |
| 797 | Mylk4         | 3 | 0          | 0.04752066  |
| 798 | Btbd17        | 3 | 4205.823   | 0.047400963 |
| 799 | Slc5a8        | 3 | 117.25765  | 0.04739228  |
| 800 | Syt12         | 3 | 22.13051   | 0.047383603 |
| 801 | Stxbp6        | 3 | 13.428273  | 0.047340255 |
| 802 | Lsamp         | 3 | 884.51526  | 0.047277544 |
| 803 | Cdkl4         | 3 | 409.67313  | 0.047275383 |
| 804 | Pbld1         | 3 | 2474.9922  | 0.04726459  |
| 805 | Mixl1         | 3 | 6.888465   | 0.047217153 |
| 806 | Cblif         | 3 | 413.09213  | 0.047210693 |
| 807 | Hoxb7         | 3 | 2051.5847  | 0.04720208  |
| 808 | Gkn3          | 3 | 3          | 0.047178414 |
| 809 | Pm20d2        | 3 | 3216.4673  | 0.04712471  |
| 810 | Ror2          | 3 | 0          | 0.047101118 |
| 811 | Mab2113       | 3 | 1398.3031  | 0.04707327  |
| 812 | Wfdc6a        | 3 | 4064       | 0.04703904  |
| 813 | Slc13a4       | 3 | 917.3962   | 0.046928134 |
| 814 | Fibin         | 3 | 535.7475   | 0.046902616 |
| 815 | P2rx6         | 3 | 15.8526125 | 0.046898365 |
| 816 | P2rx2         | 3 | 15.8526125 | 0.046898365 |
| 817 | Bex2          | 3 | 218.3055   | 0.046860144 |
| 818 | Catsperg1     | 3 | 2034       | 0.04684318  |
| 819 | Arhgef33      | 3 | 625.95984  | 0.0466805   |
| 820 | Gbx2          | 3 | 2034       | 0.046632126 |
| 821 | Ankfn1        | 3 | 31.432259  | 0.046443798 |
| 822 | Odf3b         | 3 | 294.7891   | 0.0464188   |
| 823 | Aass          | 3 | 85.55541   | 0.04640007  |
| 824 | Kcnj13        | 3 | 916.0766   | 0.04636266  |
| 825 | Fut7          | 3 | 27.327616  | 0.04636266  |
| 826 | 1700029J07Rik | 3 | 15.503689  | 0.046292156 |
| 827 | Prss46        | 3 | 4066       | 0.04626939  |
| 828 | Nnat          | 3 | 0          | 0.046248715 |
| 829 | Stk33         | 3 | 2346.3608  | 0.046242516 |
| 830 | Ccdc60        | 3 | 313.7408   | 0.045944866 |
| 831 | Klhdc8a       | 3 | 4066       | 0.045843113 |
| 832 | Frmpd2        | 3 | 535.9537   | 0.0452044   |
| 833 | Lmntd1        | 3 | 37.55169   | 0.044468313 |
| 834 | Ccn3          | 2 | 4.8687477  | 0.049185    |

---

---

|     |               |   |            |             |
|-----|---------------|---|------------|-------------|
| 835 | Esm1          | 2 | 0          | 0.048701297 |
| 836 | Cthrc1        | 2 | 0          | 0.048694424 |
| 837 | Lrrc15        | 2 | 7.619825   | 0.04850956  |
| 838 | Cys1          | 2 | 2034       | 0.048466403 |
| 839 | Hhat          | 2 | 0          | 0.048269752 |
| 840 | Fam13a        | 2 | 199.24452  | 0.048222523 |
| 841 | Tfec          | 2 | 17.082932  | 0.048222523 |
| 842 | Mtus1         | 2 | 52.50006   | 0.048182115 |
| 843 | Vwa1          | 2 | 373.76846  | 0.048173144 |
| 844 | Galnt13       | 2 | 233.74944  | 0.048141774 |
| 845 | Marcks11      | 2 | 13.070509  | 0.0480167   |
| 846 | Crabp2        | 2 | 0          | 0.047996663 |
| 847 | Dmrt2         | 2 | 0          | 0.047985535 |
| 848 | Rps6ka6       | 2 | 2038.0935  | 0.04797219  |
| 849 | Serpina3g     | 2 | 2.6183493  | 0.047961075 |
| 850 | Lhfpl2        | 2 | 0          | 0.04791223  |
| 851 | Chl1          | 2 | 11.678267  | 0.047910012 |
| 852 | 1810020O05Rik | 2 | 0          | 0.047907796 |
| 853 | Exoc3l2       | 2 | 110.85272  | 0.04789671  |
| 854 | Lctl          | 2 | 2034       | 0.047832515 |
| 855 | Fam227a       | 2 | 400.0366   | 0.047832515 |
| 856 | Srpx2         | 2 | 0.96428573 | 0.047828097 |
| 857 | Tfpi2         | 2 | 0          | 0.047788344 |
| 858 | Rab32         | 2 | 2034       | 0.047779523 |
| 859 | AA467197      | 2 | 0          | 0.047761884 |
| 860 | Efcab2        | 2 | 196.32684  | 0.047704645 |
| 861 | Syt13         | 2 | 0          | 0.04769805  |
| 862 | Fcrlb         | 2 | 97.91309   | 0.047667295 |
| 863 | Hhatl         | 2 | 0          | 0.047662906 |
| 864 | Mymk          | 2 | 18.245007  | 0.047632195 |
| 865 | Guca1b        | 2 | 1094.4567  | 0.047630005 |
| 866 | Itprid1       | 2 | 734.8584   | 0.047603715 |
| 867 | Tll3          | 2 | 2034       | 0.047597148 |
| 868 | Pclo          | 2 | 27.664503  | 0.047590584 |
| 869 | Fbxo40        | 2 | 0          | 0.047588393 |
| 870 | Asgr2         | 2 | 0          | 0.047544673 |
| 871 | Cd200r4       | 2 | 3.5815856  | 0.04748142  |
| 872 | Tppp          | 2 | 0          | 0.047450945 |
| 873 | Susd5         | 2 | 275.77176  | 0.04744877  |
| 874 | Colq          | 2 | 0          | 0.0474292   |
| 875 | Cd200r2       | 2 | 0          | 0.047418334 |
| 876 | Slc22a3       | 2 | 87.92391   | 0.04737059  |
| 877 | Ssc5d         | 2 | 0          | 0.047288343 |
| 878 | Ankrd45       | 2 | 102.57465  | 0.047253802 |

---

|     |               |   |           |             |
|-----|---------------|---|-----------|-------------|
| 879 | Crispld1      | 2 | 0         | 0.047253802 |
| 880 | Tff1          | 2 | 0         | 0.04717196  |
| 881 | Osr2          | 2 | 0         | 0.047163364 |
| 882 | Doc2g         | 2 | 0         | 0.047156915 |
| 883 | Mpz           | 2 | 0         | 0.047148325 |
| 884 | Ephb1         | 2 | 27.838223 | 0.047139734 |
| 885 | Prss22        | 2 | 297.16144 | 0.04703263  |
| 886 | Cwh43         | 2 | 330.78717 | 0.046945162 |
| 887 | Hba-a2        | 2 | 0         | 0.046940904 |
| 888 | Fam161b       | 2 | 2034      | 0.046864387 |
| 889 | Akap14        | 2 | 17.912062 | 0.04683682  |
| 890 | Gabrp         | 2 | 2034      | 0.046811398 |
| 891 | Bex6          | 2 | 114.20097 | 0.04673108  |
| 892 | Fam178b       | 2 | 420.75497 | 0.046606924 |
| 893 | Ccdc153       | 2 | 0         | 0.04657756  |
| 894 | Amn           | 2 | 91.92185  | 0.046500135 |
| 895 | Fam167b       | 2 | 495.4303  | 0.046464648 |
| 896 | Gpr160        | 2 | 356.861   | 0.04644588  |
| 897 | Thrb          | 2 | 2034      | 0.046420883 |
| 898 | Slc5a12       | 2 | 0         | 0.046395913 |
| 899 | Arhgef38      | 2 | 157.7504  | 0.04637097  |
| 900 | Diras2        | 2 | 1799.3953 | 0.046180617 |
| 901 | Guca1a        | 2 | 50.254444 | 0.046180617 |
| 902 | Bbof1         | 2 | 364.88306 | 0.04603683  |
| 903 | Syt17         | 2 | 157.5544  | 0.046032734 |
| 904 | Gm28729       | 2 | 2034      | 0.045932632 |
| 905 | Gm12695       | 2 | 132.61172 | 0.045930594 |
| 906 | Upk1a         | 2 | 45.46586  | 0.045780256 |
| 907 | Tafa5         | 2 | 217.77603 | 0.045693345 |
| 908 | Vat11         | 2 | 2034      | 0.045608778 |
| 909 | Tmem132d      | 2 | 235.8389  | 0.045508508 |
| 910 | Dcdc2a        | 2 | 0         | 0.045506507 |
| 911 | D130043K22Rik | 2 | 0         | 0.045506507 |
| 912 | R3hdml        | 2 | 2034      | 0.045295406 |
| 913 | Kctd19        | 2 | 2034      | 0.04527955  |
| 914 | Wfdc16        | 2 | 0         | 0.044962857 |
| 915 | Wfdc12        | 2 | 0         | 0.044962857 |
| 916 | Tmem213       | 2 | 184.06421 | 0.04454295  |
| 917 | Tgm1          | 2 | 2034      | 0.04452762  |
| 918 | Gpr176        | 2 | 2         | 9.67E-04    |
| 919 | Fgfbp1        | 1 | 0         | 0.048669238 |
| 920 | Esrrg         | 1 | 0         | 0.048341896 |
| 921 | Vpreb3        | 1 | 0         | 0.04828326  |
| 922 | Tnfrsf23      | 1 | 0         | 0.048274253 |

---

|     |               |   |   |             |
|-----|---------------|---|---|-------------|
| 923 | Fabp12        | 1 | 0 | 0.048215784 |
| 924 | Vipr2         | 1 | 0 | 0.048139535 |
| 925 | Pmepal        | 1 | 0 | 0.04813058  |
| 926 | Nwd1          | 1 | 0 | 0.048117153 |
| 927 | Clec11a       | 1 | 0 | 0.048085857 |
| 928 | Brinp1        | 1 | 0 | 0.047974415 |
| 929 | Sh2b2         | 1 | 0 | 0.047921102 |
| 930 | Tstd1         | 1 | 0 | 0.0478657   |
| 931 | Lgals7        | 1 | 0 | 0.0478657   |
| 932 | S100a14       | 1 | 0 | 0.047856845 |
| 933 | Akr1b8        | 1 | 0 | 0.047817048 |
| 934 | Cgref1        | 1 | 0 | 0.047783934 |
| 935 | Cyth4         | 1 | 0 | 0.047779523 |
| 936 | Bhlhe22       | 1 | 0 | 0.047779523 |
| 937 | Tbata         | 1 | 0 | 0.047768496 |
| 938 | Cemip         | 1 | 0 | 0.047764085 |
| 939 | Capn6         | 1 | 0 | 0.04775527  |
| 940 | Capn13        | 1 | 0 | 0.04775527  |
| 941 | Slurp1        | 1 | 0 | 0.047731046 |
| 942 | Galnt15       | 1 | 0 | 0.047702447 |
| 943 | Zfp469        | 1 | 0 | 0.047638774 |
| 944 | Phkg1         | 1 | 0 | 0.047405303 |
| 945 | Wfdc21        | 1 | 0 | 0.04735325  |
| 946 | Ptpn7         | 1 | 0 | 0.047351085 |
| 947 | Rnf186        | 1 | 0 | 0.04722577  |
| 948 | Ppil6         | 1 | 0 | 0.047197774 |
| 949 | Wdr49         | 1 | 0 | 0.047178414 |
| 950 | Mov10l1       | 1 | 0 | 0.047167663 |
| 951 | Acsl6         | 1 | 0 | 0.047159065 |
| 952 | Cldn10        | 1 | 0 | 0.04715262  |
| 953 | Ephx4         | 1 | 0 | 0.047146175 |
| 954 | Htr2b         | 1 | 0 | 0.04711184  |
| 955 | Sybu          | 1 | 0 | 0.04706043  |
| 956 | Pdgfrl        | 1 | 0 | 0.046979256 |
| 957 | Adam28        | 1 | 0 | 0.046968598 |
| 958 | Armex4        | 1 | 0 | 0.046964336 |
| 959 | Hilpda        | 1 | 0 | 0.04690474  |
| 960 | Faim2         | 1 | 0 | 0.04688774  |
| 961 | Myo1h         | 1 | 0 | 0.04684106  |
| 962 | Efcab12       | 1 | 0 | 0.046790235 |
| 963 | Lrtm1         | 1 | 0 | 0.046745855 |
| 964 | Hhip11        | 1 | 0 | 0.046733193 |
| 965 | Sprr1a        | 1 | 0 | 0.04671421  |
| 966 | D430041D05Rik | 1 | 0 | 0.04652731  |

---

---

|      |               |   |   |             |
|------|---------------|---|---|-------------|
| 967  | Fxyd6         | 1 | 0 | 0.04649387  |
| 968  | Ankrd37       | 1 | 0 | 0.046433378 |
| 969  | C1qtnf6       | 1 | 0 | 0.04642713  |
| 970  | Chrm3         | 1 | 0 | 0.04640423  |
| 971  | Snx7          | 1 | 0 | 0.046343975 |
| 972  | Pla2g4c       | 1 | 0 | 0.046319086 |
| 973  | Fmo1          | 1 | 0 | 0.04630251  |
| 974  | Pkhd1         | 1 | 0 | 0.046263184 |
| 975  | Tmem37        | 1 | 0 | 0.046263184 |
| 976  | Raet1d        | 1 | 0 | 0.0462198   |
| 977  | Klrc3         | 1 | 0 | 0.0462198   |
| 978  | Alx4          | 1 | 0 | 0.046205357 |
| 979  | Pla1a         | 1 | 0 | 0.046157964 |
| 980  | Dchs2         | 1 | 0 | 0.046157964 |
| 981  | Kcnk12        | 1 | 0 | 0.04612505  |
| 982  | Adra1a        | 1 | 0 | 0.04610861  |
| 983  | Cpne5         | 1 | 0 | 0.046002045 |
| 984  | Fam180a       | 1 | 0 | 0.045985695 |
| 985  | Zbbx          | 1 | 0 | 0.045928556 |
| 986  | Otx1          | 1 | 0 | 0.045902077 |
| 987  | Acox1         | 1 | 0 | 0.045881726 |
| 988  | Serpina9      | 1 | 0 | 0.045834996 |
| 989  | Kirrel3       | 1 | 0 | 0.045834996 |
| 990  | Ydjc          | 1 | 0 | 0.045697384 |
| 991  | Shisa4        | 1 | 0 | 0.04568528  |
| 992  | Nrgn          | 1 | 0 | 0.04568326  |
| 993  | Rab3il1       | 1 | 0 | 0.045636933 |
| 994  | Oas1e         | 1 | 0 | 0.04557865  |
| 995  | Tll6          | 1 | 0 | 0.04547052  |
| 996  | Abca14        | 1 | 0 | 0.04544257  |
| 997  | Ttc16         | 1 | 0 | 0.04543858  |
| 998  | Me3           | 1 | 0 | 0.04539872  |
| 999  | Tmem28        | 1 | 0 | 0.04534303  |
| 1000 | Lrrn2         | 1 | 0 | 0.045202427 |
| 1001 | Dpysl5        | 1 | 0 | 0.045202427 |
| 1002 | Hoxb8         | 1 | 0 | 0.04510983  |
| 1003 | Pheta2        | 1 | 0 | 0.045039166 |
| 1004 | 9030025P20Rik | 1 | 0 | 0.044801317 |
| 1005 | Xkr5          | 1 | 0 | 0.04478193  |
| 1006 | Gabre         | 1 | 0 | 0.044752885 |
| 1007 | Tal2          | 1 | 0 | 0.044589005 |
| 1008 | Sec14l5       | 1 | 0 | 0.0445794   |
| 1009 | Iyd           | 1 | 0 | 0.044569805 |
| 1010 | Dio3          | 1 | 0 | 0.04439583  |

---

---

|      |               |   |   |             |
|------|---------------|---|---|-------------|
| 1011 | Crfl1         | 1 | 0 | 0.04425725  |
| 1012 | Ccdc162       | 1 | 0 | 0.04425725  |
| 1013 | 1700016K19Rik | 1 | 0 | 0.04423266  |
| 1014 | Gm32742       | 1 | 0 | 0.043949045 |
| 1015 | Prpt4         | 1 | 0 | 0.043867085 |
| 1016 | Lemd1         | 1 | 0 | 0.043867085 |
| 1017 | Fn3k          | 1 | 0 | 0.043652467 |
| 1018 | Slc16a11      | 1 | 0 | 0.043365315 |
| 1019 | Dqx1          | 1 | 0 | 0.043350786 |
| 1020 | Rptn          | 1 | 0 | 0.04266106  |
| 1021 | Gpr20         | 1 | 0 | 9.67E-04    |
| 1022 | Fsip1         | 1 | 0 | 9.67E-04    |
| 1023 | Rnf152        | 1 | 0 | 9.66E-04    |
| 1024 | Paqr9         | 1 | 0 | 9.66E-04    |
| 1025 | Tnfaip811     | 1 | 0 | 9.66E-04    |
| 1026 | Mettl7a3      | 1 | 0 | 9.66E-04    |
| 1027 | Tvp23a        | 1 | 0 | 9.66E-04    |
| 1028 | Gprasp2       | 1 | 0 | 9.66E-04    |
| 1029 | Tcf23         | 1 | 0 | 9.66E-04    |
| 1030 | Efcab5        | 1 | 0 | 9.66E-04    |
| 1031 | Glb1l3        | 1 | 0 | 9.66E-04    |
| 1032 | Cst8          | 1 | 0 | 9.66E-04    |
| 1033 | Pabpn11       | 1 | 0 | 9.66E-04    |
| 1034 | Btg4          | 1 | 0 | 9.66E-04    |
| 1035 | Phf11a        | 1 | 0 | 9.66E-04    |
| 1036 | Adam33        | 1 | 0 | 9.66E-04    |

---
