# Supplementary material for: RNA-seq analysis and in vivo experiments identified the protective effect of kaempferol on idiopathic pulmonary fibrosis by regulating the PPARG/TNC signaling pathway to reduce ECM deposition
Source: Royal Society of Chemistry journal article supplement (doi:10.1039/d4fo01474j), 2024-01-01
Supplement: d4fo01474j3.pdf [file d4fo01474j3.pdf]

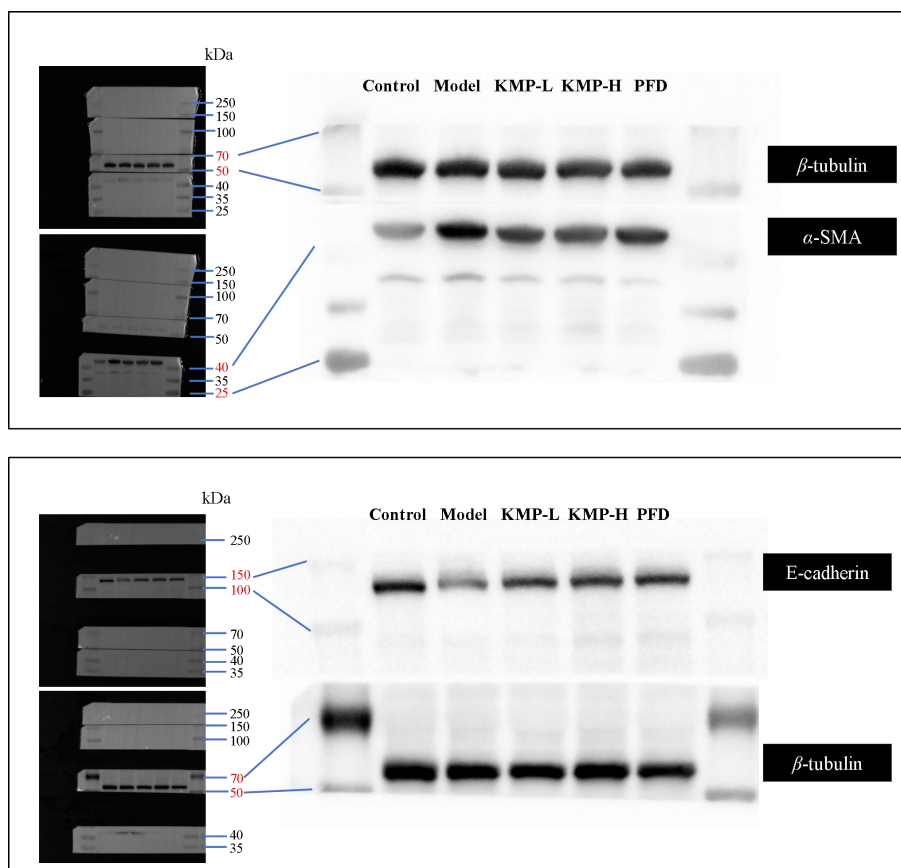

Fig.S1 Raw data of  $\alpha$ -SMA and E-cadherin for western blot in Fig. 4K-L. KMP-L: Low-dose of kaempferol group; KMP-H: High-dose of kaempferol group; PFD: Pirfenidone group.

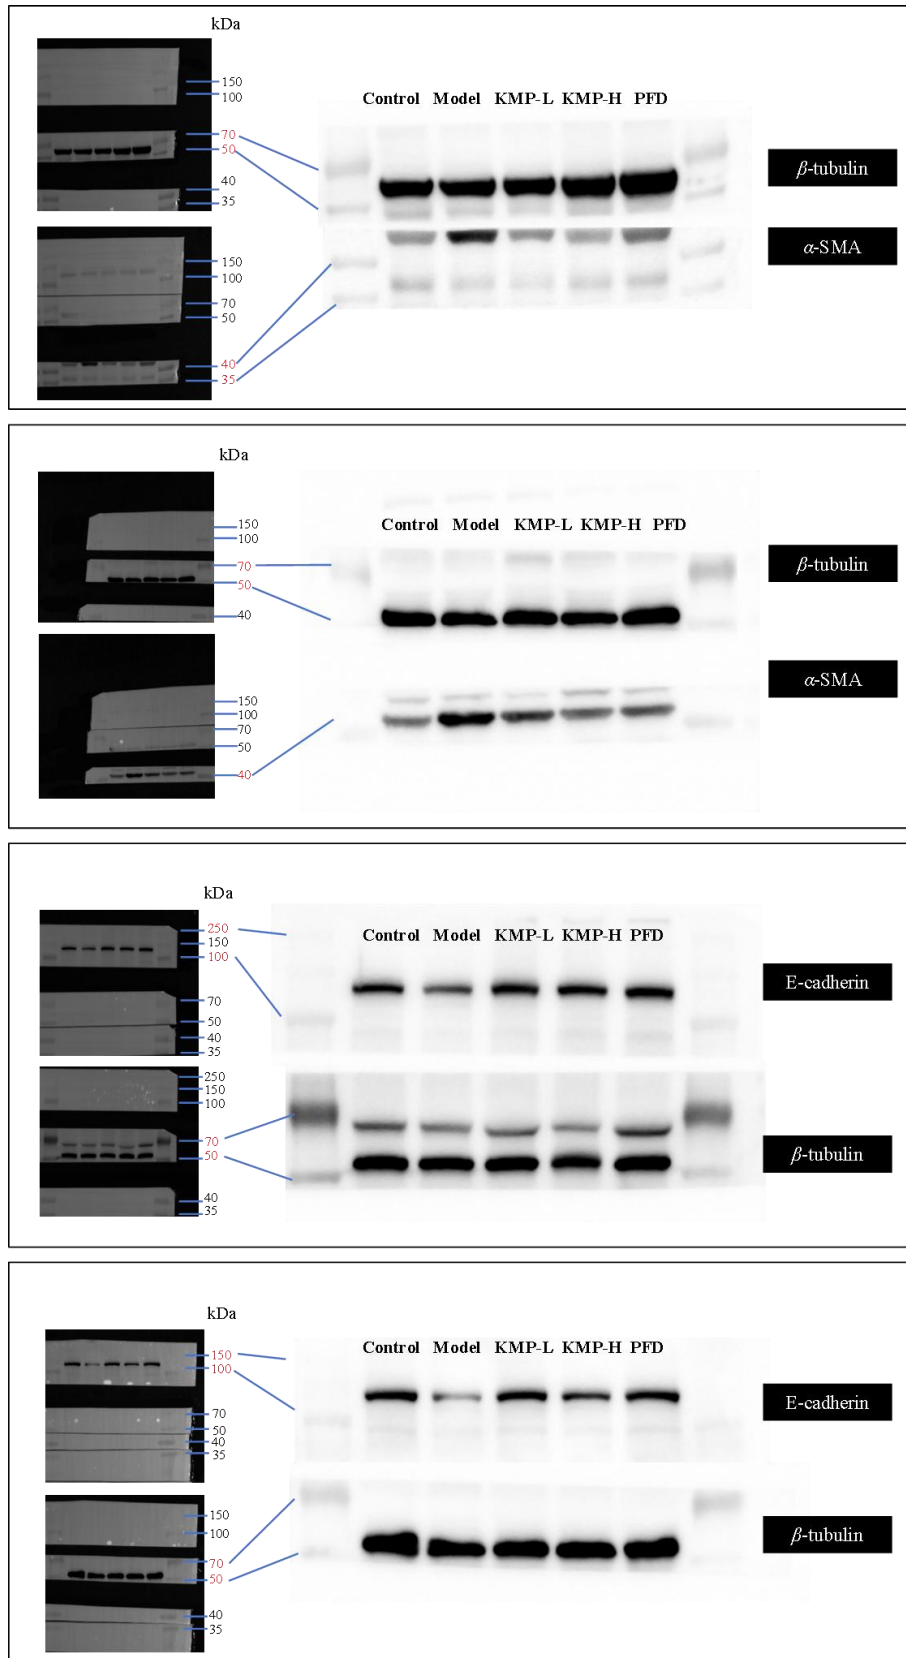

Fig.S2. The original data of  $\alpha$ -SMA and E-cadherin for western blot statistics. KMP-L: Low-dose of kaempferol group; KMP-H: High-dose of kaempferol group; PFD: Pirfenidone group.

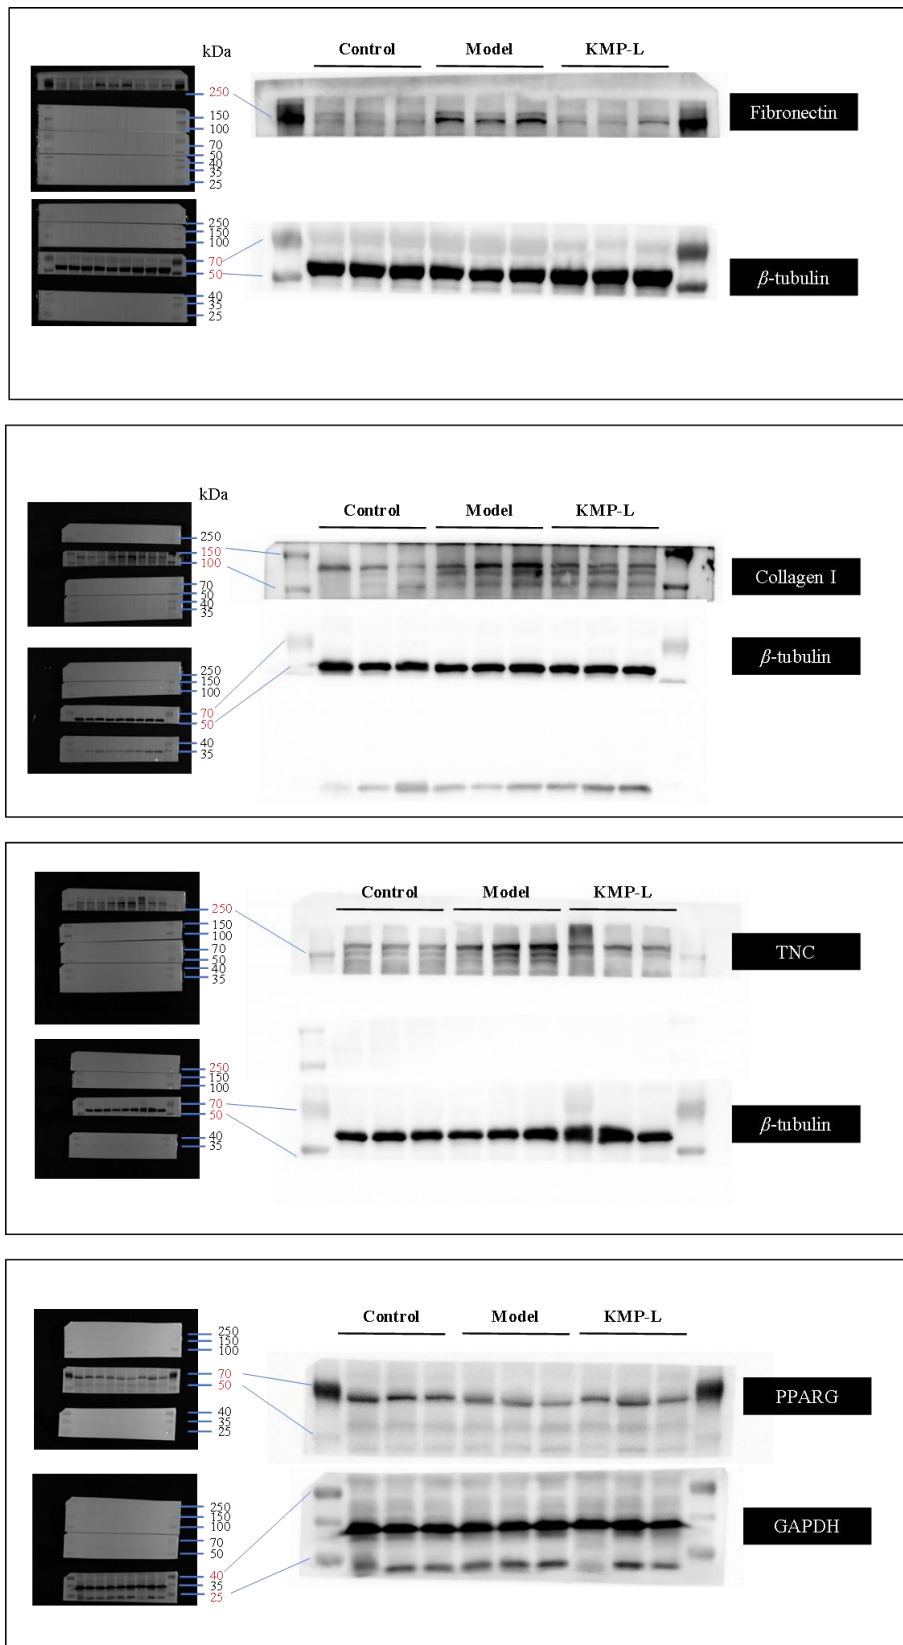

Fig.S3. Raw data of Fibronectin, Collagen I, TNC and PPARG for western blot in Fig. 8A. KMP-L: Low-dose of kaempferol group.

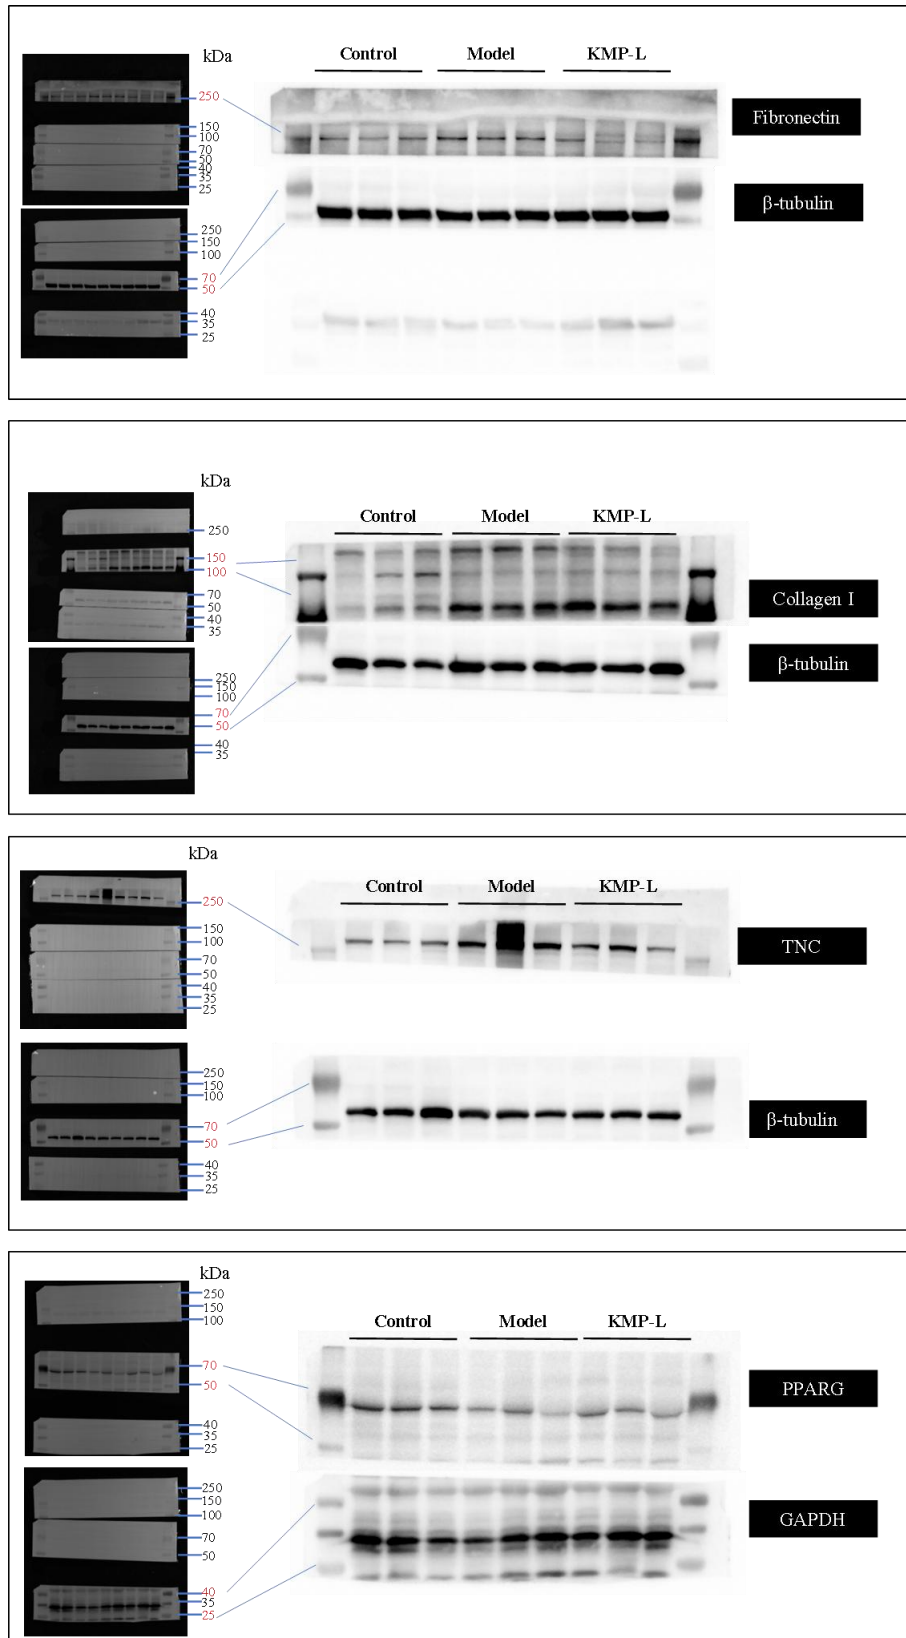

Fig.S4. The original data of Fibronectin, Collagen I, TNC, and PPARG for western blot statistics in Figure 8B. KMP-L: Low-dose of kaempferol group.
